# Supplementary material for: Approaches to the design of efficient and stable catalysts for biofuel reforming into syngas: doping the mesoporous MgAl2O4 support with transition metal cations
Source: Royal Society of Chemistry journal article supplement (doi:10.1039/d3dt00830d), 2023-01-01
Supplement: d3dt00830d1.pdf [file d3dt00830d1.pdf]

## Supplementary materials

### 1. Calculation of efficient first-order rate constants of catalytic reactions and turnover frequency (TOF).

Efficient first-order rate constant was calculated using the integral equation

$$k_{eff} = -\frac{\ln(1 - X_{CH_4})}{\tau},$$

where  $X$  is degree of reagent (methane, ethanol) conversion at contact time  $\tau$  (s)

Turnover frequency (TOF) is defined as the maximum number of chemical conversions of substrate molecules per unit time over a single catalytic site.

TOF was calculated as ratio of the initial reaction rate  $W_0$  (mole  $s^{-1}$ ) (being equal to  $k_{eff} \cdot C^0$ ) to the content of metal sites  $Z$  estimated by CO chemisorption (mol/g<sub>cat</sub>) and catalyst bulk density  $\rho$  (g/l)

$$TOF = \frac{k_{eff} \cdot C_{CH_4}^0}{Z \cdot \rho}$$

### 2. Texture

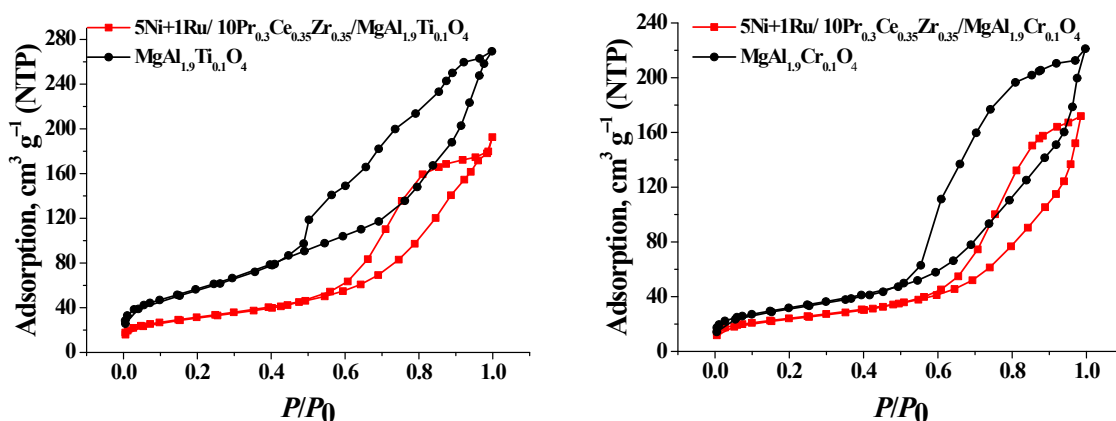

**Figure S1.** Adsorption-desorption isotherms for doped MgAl<sub>2</sub>O<sub>4</sub> mesoporous support and series 2 Ti<sub>2</sub> and Cr<sub>2</sub> catalysts

### 3. XPS spectra

In Figures S2-S5 1, 2, and 3 spectra correspond to 5%Ni+1%Ru/10%Pr<sub>0.3</sub>Ce<sub>0.35</sub>Zr<sub>0.35</sub>/MgAl<sub>1.9</sub>Fe<sub>0.1</sub>O<sub>4</sub> (Fe1), 5%Ni+1%Ru/10%Pr<sub>0.3</sub>Ce<sub>0.35</sub>Zr<sub>0.35</sub>/MgAl<sub>1.9</sub>Ti<sub>0.1</sub>O<sub>4</sub> (Ti1), and 5%Ni+1%Ru/10%Pr<sub>0.3</sub>Ce<sub>0.35</sub>Zr<sub>0.35</sub>/MgAl<sub>1.9</sub>Cr<sub>0.1</sub>O<sub>4</sub> (Cr1) catalysts, respectively.

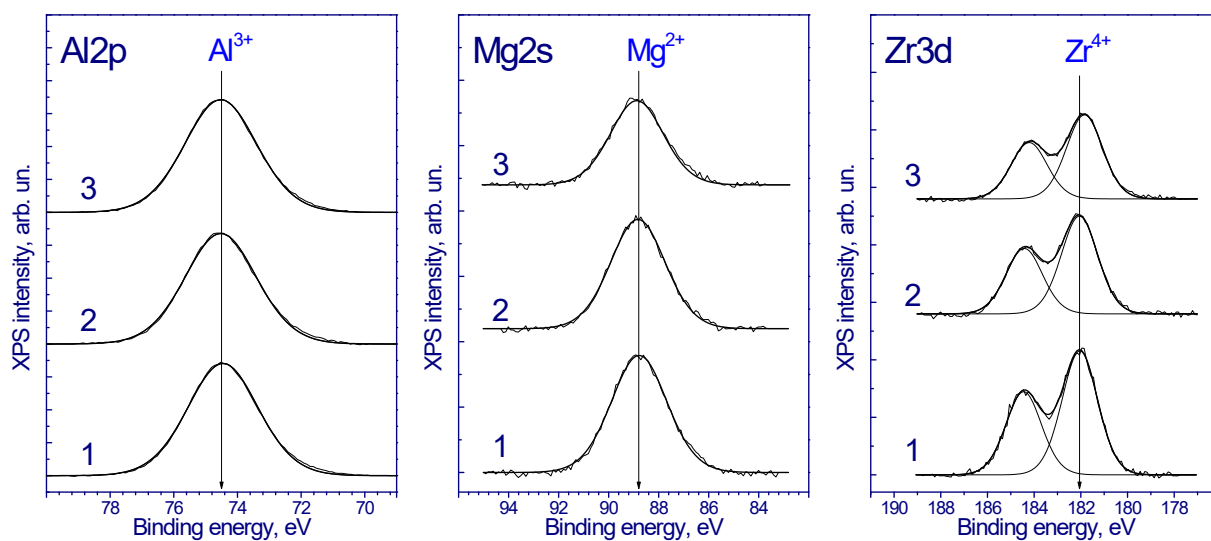

**Figure S2.** Al2p, Mg2s and Zr3d core-level spectra of the catalysts. The spectra are normalized on the total concentration of Al and Mg.

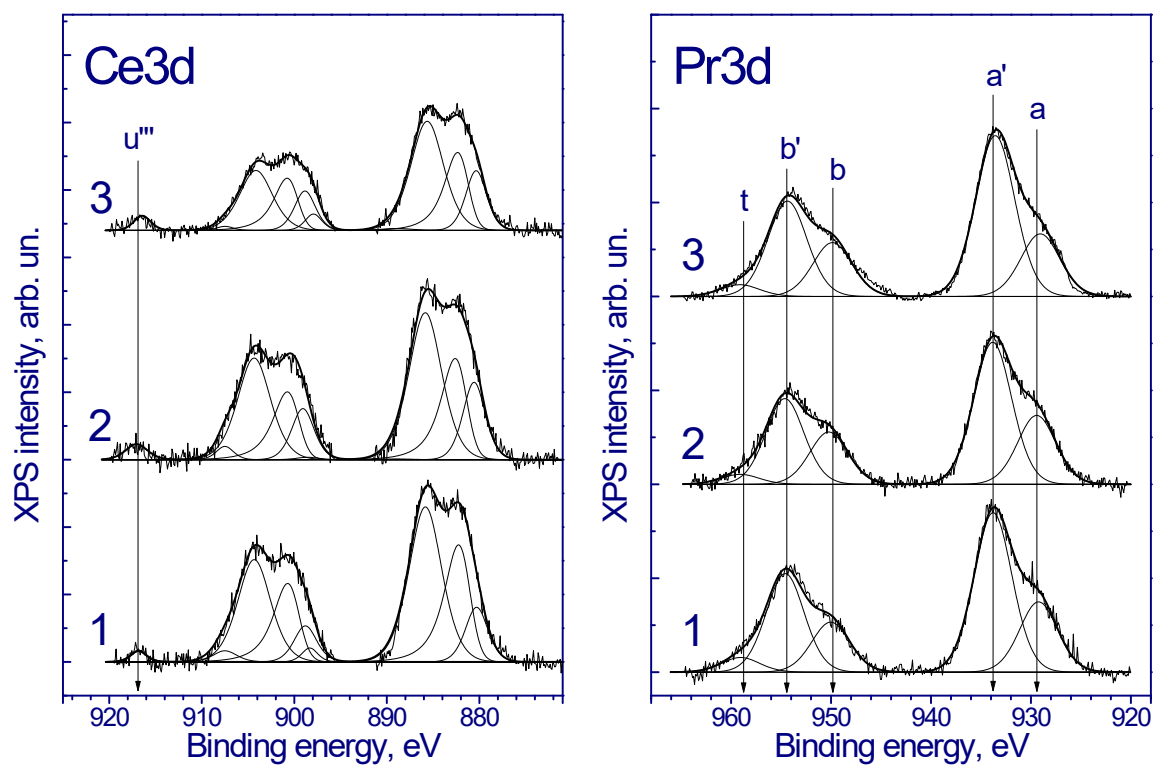

**Figure S3.** Ce3d and Pr3d core-level spectra of the catalysts. The spectra are normalized to the total concentration of Al and Mg.

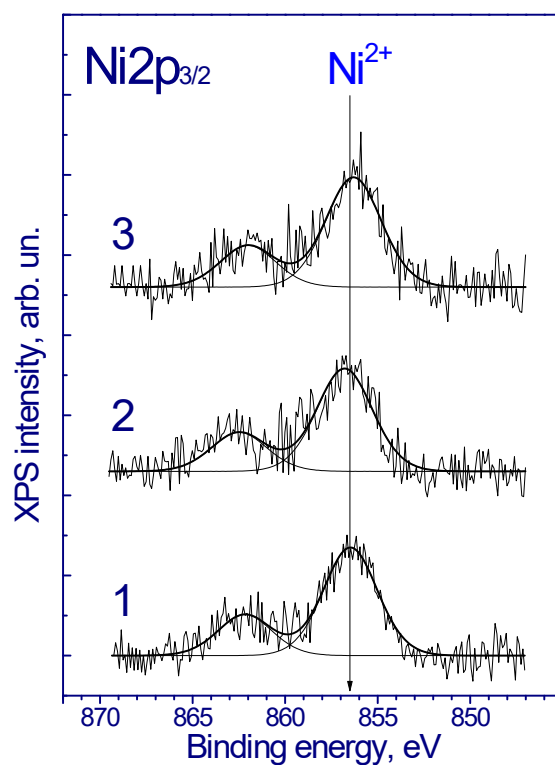

**Figure S4.** Ni $2p_{3/2}$  core-level spectra of the catalysts. The spectra are normalized to the total concentration of Al and Mg.

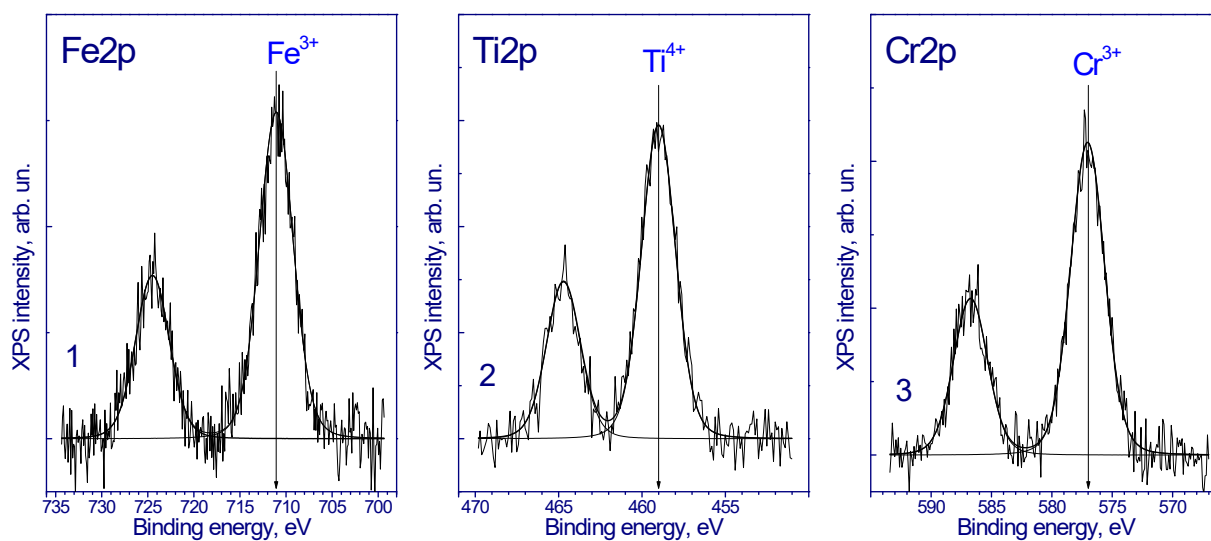

**Figure S5.** Fe $2p$ , Ti $2p$ , and Cr $2p$  core-level spectra of the catalysts. The spectra are normalized to the total concentration of Al and Mg.

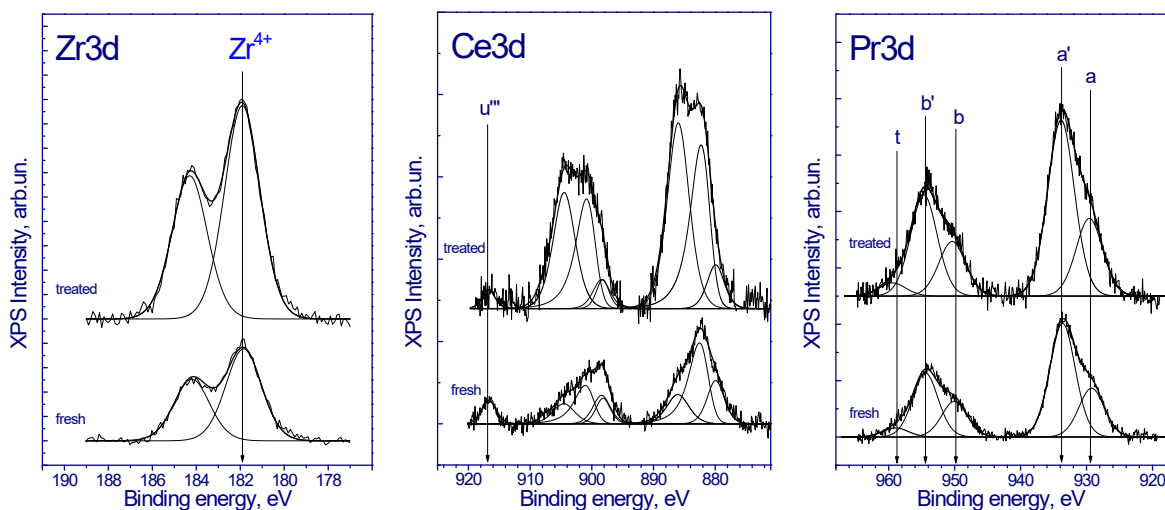

**Figure S6.** Zr 3d, Ce 3d and Pr3d core-level spectra of the Cr2 catalyst in fresh and treated states. The spectra are normalized to the total concentration of Al and Mg.

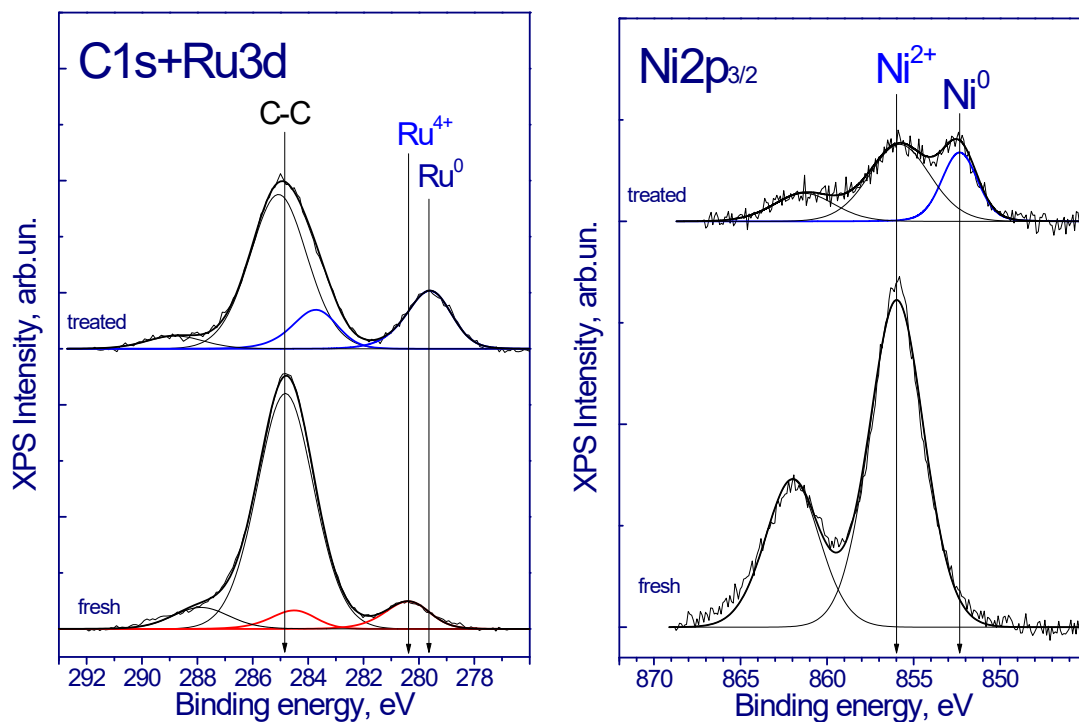

**Figure S7.** Ru 3d and Ni $2p_{3/2}$  core-level spectra of the Cr2 catalyst in fresh and treated states. The spectra are normalized to the total concentration of Al and Mg.

Pr $3d$  spectra have a complex shape, since, first, due to spin-orbital interaction 3d-level is splitted on two sublevels Pr $3d_{5/2}$  и Pr $3d_{3/2}$ , which results in appearance of a doublet with the ratio of intensity lines as 3:2; second, each component of the doublet is splitted into three lines – a/b, a'b', a''/b'' and t (additional peak in spectrum of Pr $3d_{3/2}$ ) [Borchert, H., Frolova, Y.V., Kaichev, V.V., Prosvirin, I.P., Alikina, G.M., Lukashevich, A.I., Zaikovskii, V.I., Moroz, E.M., Trukhan, S.N., Ivanov, V.P., Paukshtis, E.A., Bukhtiyarov, V.I., Sadykov, V.A., J. Phys. Chem. B **2005**, 109, 5728-5738]. In

spectrum of pure  $\text{Pr}_2\text{O}_3$  where Pr is in 3+ state a''/b'' doublet is not observed. In  $\text{Pr}3d$  spectra (Figs. S3 and S7) doublet a''/b'' is absent, hence, Pr is mainly in  $\text{Pr}^{3+}$  state.

**Table S1. Binding energies and states of metals in fresh and treated R2 catalysts**

| Sample  | $\text{Zr}3d_{5/2}$ | $\text{Ce}3d_{5/2}$<br>(u''') | $\text{Ni}2p_{3/2}$ |                  | $\text{Ru}3d_{5/2}$ |                  | $\text{Pr}3d_{5/2}$ | $\text{Al}2p$    | $\text{Mg}2s$    |
|---------|---------------------|-------------------------------|---------------------|------------------|---------------------|------------------|---------------------|------------------|------------------|
|         | $\text{Zr}^{4+}$    |                               | $\text{Ni}^0$       | $\text{Ni}^{2+}$ | $\text{Ru}^0$       | $\text{Ru}^{4+}$ | $\text{Pr}^{3+}$    | $\text{Al}^{3+}$ | $\text{Mg}^{2+}$ |
| Fresh   | 181.8               | 916.6                         | –                   | 856.1            | –                   | 280.3            | 929.3<br>933.7      | 74.5             | 88.8             |
| Treated | 181.9               | 916.7                         | 852.6<br>(28%)      | 855.8<br>(72%)   | 279.5               | –                | 929.6<br>933.9      | 74.5             | 88.8             |

**Table S2. Surface concentration of elements normalized on the total concentration of Al+Mg and Mg/Al ratio determined by XPS in fresh and treated R2 catalysts**

| Sample  | [C]  | [O]  | [Mg]/[Al] |
|---------|------|------|-----------|
| Fresh   | 1.40 | 2.55 | 0.47      |
| Treated | 0.90 | 2.30 | 0.41      |

#### 4. Methane dry reforming

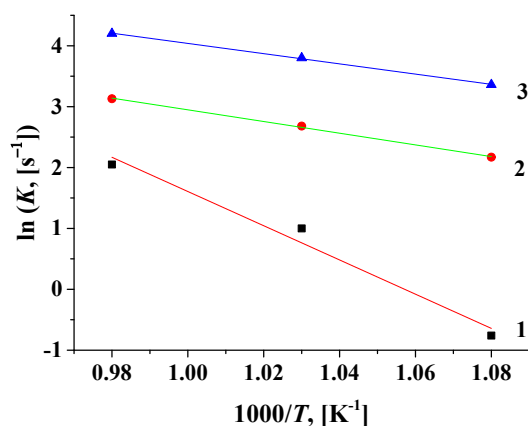

**Fig. S8.** Arrhenius plots of efficient first-order rate constants of methane dry reforming for series one catalysts: 1-Fe1, 2-Ti1, 3-Cr1. Feed 15% $\text{CH}_4$  + 15%  $\text{CO}_2$  in He, contact time 15 ms.

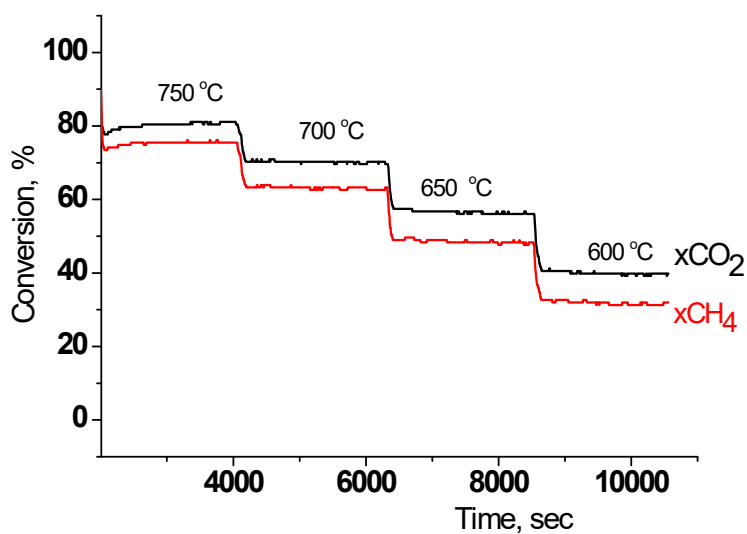

**Fig. S9.** Cr<sub>2</sub> catalyst performance stability in the temperature range 750-600 °C. Feed 15 vol. % CH<sub>4</sub> +15 vol. % CO<sub>2</sub>+ He balance, contact time 0.015 s

### 5. Steam reforming of ethanol

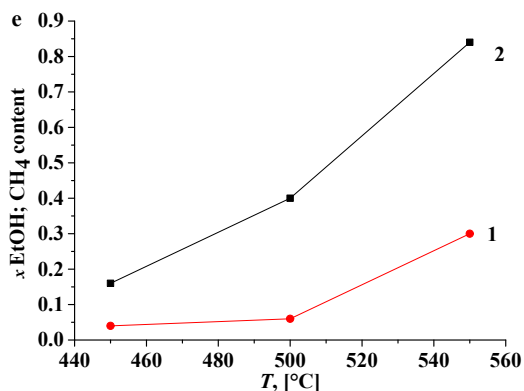

**Fig. S10.** Temperature dependence of CH<sub>4</sub> content (1, %) and EtOH conversion (2, degree) in the low-temperature range 450-550 °C for Cr<sub>2</sub> catalyst. Feed 2% EtOH +8% H<sub>2</sub>O in He, contact time 8 ms.

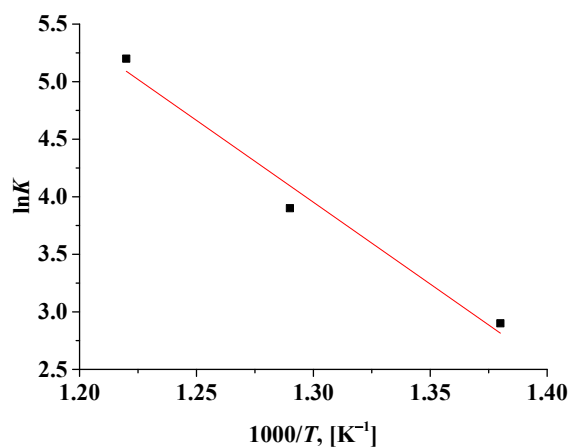

**Fig. S11.** Arrhenius plots of the efficient first-order rate constants of ethanol steam reforming on Cr2 catalyst. Feed 2% EtOH +8% H<sub>2</sub>O in He, contact time 8 ms.

### 5. Stability of structured catalyst performance

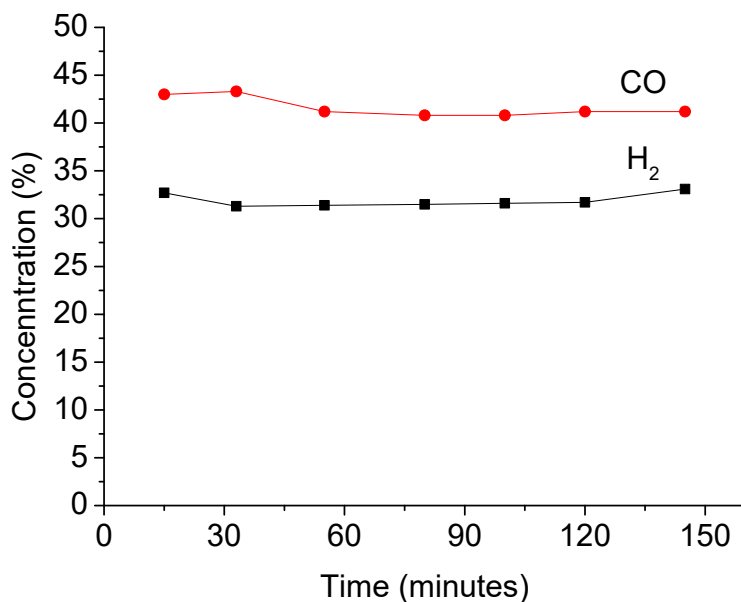

**Fig. S12.** Stability of structured catalyst performance in natural gas (NG) dry reforming. Feed 42% NG+51% CO<sub>2</sub>+N<sub>2</sub>, 700 °C, contact time 1.22 s.

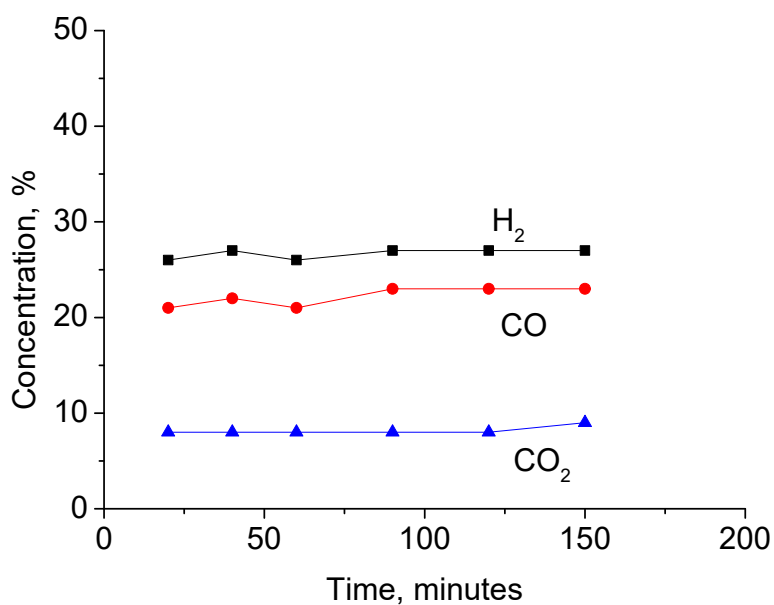

**Fig. S13.** Stability of structured catalyst performance in ethanol dry reforming. Feed 22% EtOH +21% CO<sub>2</sub> +N<sub>2</sub>, 780 °C, contact time 0.33 s.

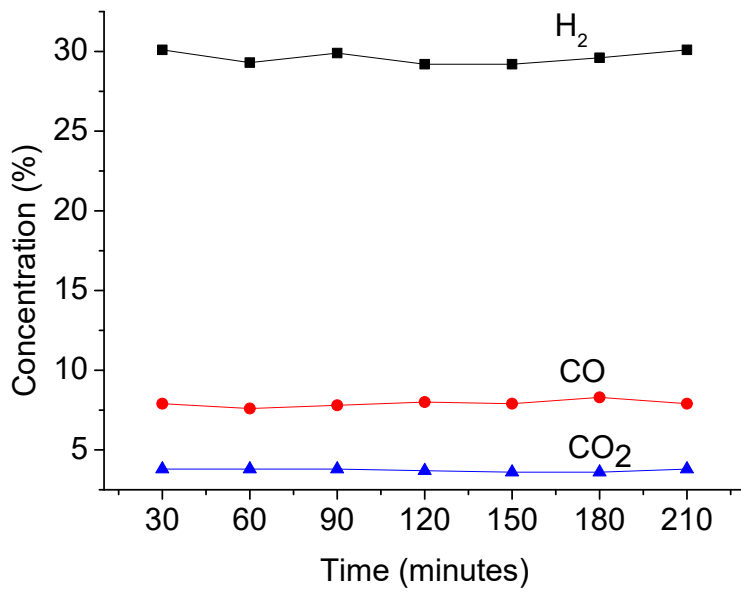

**Fig. S14** . Stability of structured catalyst performance in ethanol steam reforming. Feed 10.3% EtOH+40.7% $H_2O+N_2$ , 710 °C, contact time 0.23 s

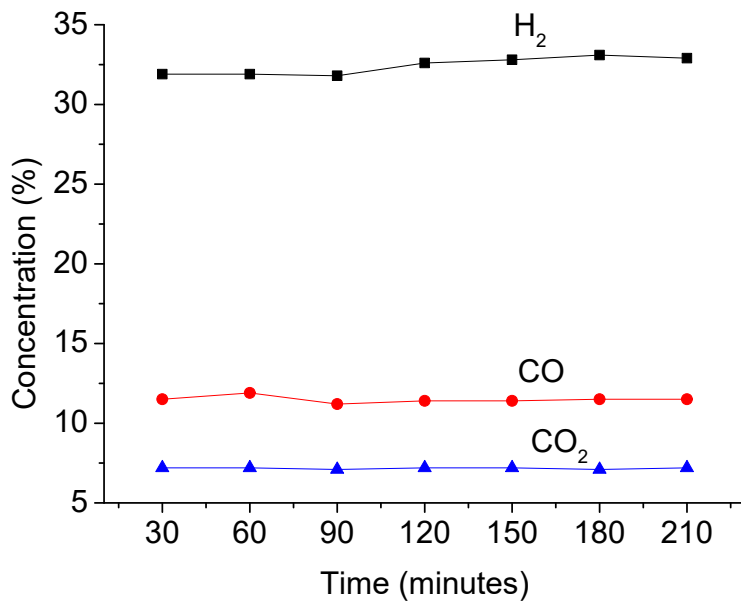

**Fig. S15**. Stability of structured catalyst performance in ethanol oxysteam reforming. Feed 12.4%EtOH+ 49% $H_2O+ 8.1\%O_2+N_2$ , 760 °C, contact time 0.25 s

c



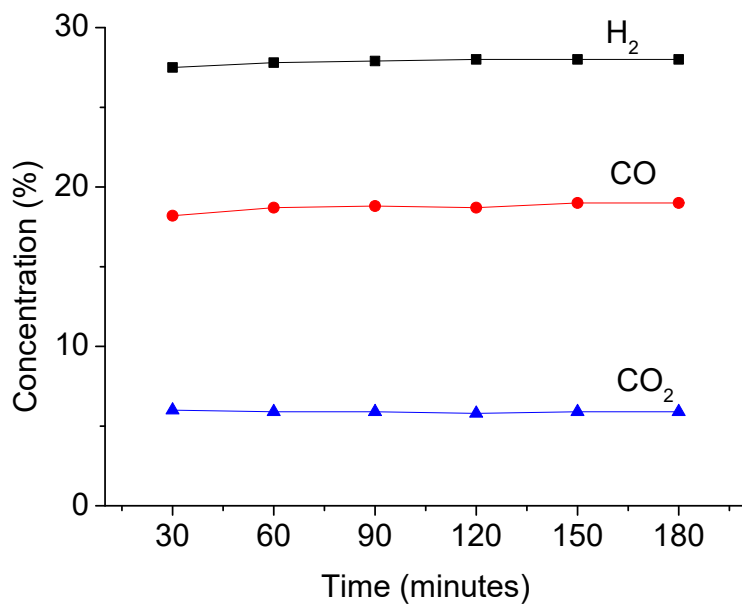

d

**Fig. S16.** . Stability of structured catalyst performance in ethanol mixed steam-dry reforming. Feed 20 % EtOH +11.5% CO<sub>2</sub>+7.4%H<sub>2</sub>O +N<sub>2</sub> , 750 °C, contact time 0.35 s
